# Supplementary material for: Entropy of Chaotic Transitions of EEG Phase Growth in Bipolar Disorder With Lithium Carbonate
Source: Research Square preprint supplement (doi:10.21203/rs.3.rs-143318/v1), 2021-01-19
Supplement: Supplementary file 2 [file 2a9911298f14e9f073bbeaa4.docx]

**Table- 1:** p-associations to Wilcoxon-sign test of entropy values of positive Schwarzian chaos between pre- and postmedication over 10 bipolar patients for 21 electrodes each over 60000 time points at a 125 Hz sampling frequency corresponding to 8 min. recording periods.

| Patient No | p-value |
| --- | --- |
| 1 | 5.95697790745638e-05 |
| 2 | 6.89875106961588e-05 |
| 3 | 0.00572318650007024 |
| 4 | 0.000141253687578324 |
| 5 | 5.95697790745638e-05 |
| 6 | 5.95697790745638e-05 |
| 7 | 5.95697790745638e-05 |
| 8 | 0.0734508612828446 |
| 9 | 5.95697790745638e-05 |
| 10 | 5.95697790745638e-05 |
